# Supplementary material for: Implementation and Sustainability of Hospital-based Addiction Consultation Services
Source: Research Square preprint supplement (doi:10.21203/rs.3.rs-8177037/v1), 2025-12-15
Supplement: Supplementary file 1 [file 204a6defe67c607352ba7d25.docx]

**Table 4. Characteristics of ACSs**

| **Org #** | **Region** | **Tenure of ACS** | **Home of ACS in Hospitals** | **ACS Category** | **Mentioned in Englander taxonomy?** | **Types of Staff** | **Initial Funding - Standardized** | **Current Funding - Standardized** |
| --- | --- | --- | --- | --- | --- | --- | --- | --- |
| 1 | Northeast | 10 or more years ago | Psychiatry | Addiction Consult Model/Psychiatry consult liaison service | Yes | Addiction Physicians, Attending, Psychiatry Residents, Social Workers | Hospital/Health System Funding | Hospital/Health System Funding; Philanthropic/Donor Funding; Grant Funding; Government Funding (Non-Grant) |
| 2 | Northeast | 10 or more years ago | Addiction Medicine | Addiction Consult Model/Interprofessional addiction consult service | Yes | Addiction Medicine Fellow, Attending Physician, Nurse Practitioners, Peer Coach, Residents & Students, Social Worker | Hospital/Health System Funding | Professional Billing Revenue; Hospital/Health System Fundin |
| 3 | Mid-Atlantic | 5-9 years ago | Addiction Medicine | Practice-based model/Hospital-based opioid treatment (HBOT) | Yes | Addiction Medicine Fellows, Attending, Peers, Physicians, Social Workers | Grant Funding | Hospital/Health System Funding |
| 4 | Northeast | 5-9 years ago | Addiction Medicine | Addiction Consult Model/Interprofessional addiction consult service | Yes | Addiction Medicine Fellows, Addiction Medicine Physicians, Nurse Practitioners, Resource Specialists, Social Works | Hospital/Health System Funding; Grant Funding | Professional Billing Revenue; Grant Funding |
| 5 | Northeast | 1-4 years ago | Psychiatry | Addiction Consult Model/Psychiatry consult liaison service | Yes | Addiction Medicine Fellows, Physicians, Psychiatrists, Social Worker | Hospital/Health System Funding | Hospital/Health System Funding; Other/Not Specified |
| 6 | Midwest | 1-4 years ago | Psychiatry | Addiction Consult Model/Psychiatry consult liaison service | No | Interns, Psychiatry Fellows, Psychiatrists, Residents, Social Worker | Hospital/Health System Funding | Hospital/Health System Funding; Other/Not Specified |
| 7 | Northeast | 5-9 years ago | Psychiatry | Addiction Consult Model/Psychiatry consult liaison service | No | Addiction Counselor, Addiction Medicine Fellows, Peer, Physicians or Nurse Practitioner, Social Workers | Grant Funding; Government Funding (Non-Grant) | Hospital/Health System Funding |
| 8 | West | 5-9 years ago | Psychiatry | Addiction Consult Model/Interprofessional addiction consult service | Yes | Attending Addiction Physician, Attending Physicians from Internal and Family Medicine, Nurse Practitioners, Social Workers | Grant Funding; Philanthropic/Donor Funding; Government Funding (Non-Grant) | Hospital/Health System Funding; Government Funding (Non-Grant) |
| 9 | West | 5-9 years ago | Internal and Family Medicine | Practice-based model/Hospital-based alchohol treatment | Yes | Attending Physicians from multiple departments, Nurse Practitioners, Patient Navigators, Social Workers | Grant Funding; Philanthropic/Donor Funding; Government Funding (Non-Grant) | Hospital/Health System Funding |
| 10 | West | 1-4 years ago | Medicine | Addiction Consult Model/Psychiatry consult liaison service | Yes | Attending Physicians, Fellows from Addiction Medicine Psychiatry Toxicology, Medical Students, Residents, Scheduler, Social Worker | Grant Funding | Hospital/Health System Funding; Grant Funding |
| 11 | West | 5-9 years ago | Hospital Medicine | Addiction Consult Model/Interprofessional addiction consult service | Yes | Addiction or Hospital Medicine Physicians, Care Coordinator, Fellows, Nurse Practitioners, Social Worker | Grant Funding; Government Funding (Non-Grant) | Hospital/Health System Funding |
| 12 | South | 10 or more years ago |  | Addiction Consult Model/Interprofessional addiction consult service | Yes | Addiction Councilor, Care Managers, Nurse Practitioners, Peers, Physicians | Other/Not Specified; Hospital/Health System Funding? | Government Funding (Non-Grant); Hospital/Health System Funding |
| 13 | Midwest | 10 or more years ago |  | Addiction Consult Model/Individual consultant | Yes | Addiction Medicine Physicians, Councilors, Social Workers | Volunteer/Unfunded; Other/Not Specified | Hospital/Health System Funding |
| 14 | Northeast | 5-9 years ago | Medicine | Addiction Consult Model/Interprofessional addiction consult service* | No | Attending Physicians, Fellows, Medical Trainees, Nurse Practitioner, Residents, Social Workers, Students, Peer | Hospital/Health System Funding | Hospital/Health System Funding; Grant Funding |
| 15 | West | 5-9 years ago | Psychiatry and VA affiliation | Addiction Consult Model/Psychiatry consult liaison service* | No | Addiction Fellows, Addiction Psychiatrics, Residents in General Medicine and Psychiatry, Social Workers, Students | Volunteer/Unfunded | Hospital/Health System Funding; Professional Billing Revenue |
| 16 | Northeast | 1-4 years ago |  | Addiction Consult Model/Interprofessional addiction consult service* | No | Fellows, Hospitalists, Peer, Researcher | Other/Not Specified | Other/Not Specified |
| 17 | Northeast | 5-9 years ago | Internal Medicine | Addiction Consult Model/Interprofessional addiction consult service | Yes | APPs, Addiction Medicine Physicians, Health Promotion Advocates, Fellows, Social Workers, Social Worker | Hospital/Health System Funding; Grant Funding | Hospital/Health System Funding |
