# Supplementary material for: Implementation and Sustainability of Hospital-based Addiction Consultation Services
Source: Research Square preprint supplement (doi:10.21203/rs.3.rs-8177037/v1), 2025-12-15
Supplement: Supplementary file 2 [file 911d2d45e0946221ce3b87ee.docx]

**Table 3. Participant Demographics**

| **Participants** | **N** | **(%)** |
| --- | --- | --- |
| **N (Total Interviewees)** | **21** |  |
| **N (Survey Respondents)** | **18** | **(86%)** |
| **Participant’s Role at Hospital** |  |  |
| Physician | 15 | (83%) |
| Administrator | 3 | (17%) |
| **Gender** |  |  |
| Female | 11 | (61%) |
| Male | 7 | (39%) |
| **Hispanic/Latino** | **4** | **(22%)** |
| **Race** |  |  |
| American Indian/Alaskan Native | 0 |  |
| Asian | 2 | (11%) |
| Black/African American | 0 |  |
| Native Hawaiian/Pacific Islander | 0 |  |
| White | 15 | (83%) |
| Other Race | 1 | (6%) |
| **Participant is currently a clinician on an ACS** | 16 | (89%) |
| **Participant's tenure as clinician on ACS** |  |  |
| Less than a year | 2 | (11%) |
| 1-2 Years | 2 | (11%) |
| 3-5 Years | 2 | (11%) |
| Longer than 5 Years | 10 | (56%) |
| **Tenure of ACS** |  |  |
| Less than a year | 2 | (11%) |
| 1-2 Years | 2 | (11%) |
| 3-5 Years | 3 | (17%) |
| Longer than 5 Years | 11 | (61%) |
