# Supplementary material for: Implementation and Sustainability of Hospital-based Addiction Consultation Services
Source: Research Square preprint supplement (doi:10.21203/rs.3.rs-8177037/v1), 2025-12-15
Supplement: Supplementary file 3 [file bc0dd006e0ee570c0d50144c.docx]

**Table 2. Codes and Definitions for Analysis of Interview Data**

| **Codes** | **Definition** |
| --- | --- |
| Establishment of the ACS (Driving Factors/How and why did you start). | Role of champions or advocates or specific leaders; Extent to which the perceived need drove the start of the ACS; Hospital needs that helped facilitate the start of the ACE; Extent to which external factors like policy helped facilitate the start of the ACS (Financial topics should be coded under IE. Initial Funding)  Child codes:   - Champion(s) - High need/hospital reasons - Policy/Medicare mandate - other |
| Decisionmakers/ leadership/championship | Influence or role of leaders/decisionmakers on sustainment of ACS |
| Location in hospital | Discussion about issues related to location of ACS in hospital |
| Communications | Communication/relationships w/in the hospital; Community/linkage partnerships  Child codes:   - Communication/relationships w/in the hospital   Communication/relationships with community/linkage partnerships |
| Staffing | Staffing composition plus issues related to staffing composition or needs; why and how the ACS evolved over time |
| Funding | Types of funding used to support the ACS or related funding issues |
| Activities, services provided, workflow integration & coordination | What the ACS does / how the ACS provides its services, how activities have evolved |
| Tracking/monitoring/ evaluation | How the ACS is or is not monitored, evaluated, or tracked; oversight of ACS |
| Barriers/challenges to implementation and sustainment | Barriers or challenges that impact the current ACS |
| Facilitators to implementation and sustainment | Facilitators that impact the current ACS |
| Needed ACS improvements/deficits/ challenges/future plans & changes | Discussion about needed ACS improvements/deficits/challenges/future plans & changes |
